# A Stomata Classification and Detection System in Microscope Images of Maize Cultivars

Alexandre H. Aono<sup>a</sup>, James S. Nagai<sup>a</sup>, Gabriella da S. M. Dickel<sup>b</sup>, Rafaela C. Marinho<sup>b</sup>, Paulo E. A. M. de Oliveira<sup>b</sup>, Fabio A. Faria<sup>a,\*</sup>

<sup>a</sup> *Instituto de Ciência e Tecnologia, Universidade Federal de São Paulo – UNIFESP  
12247-014, São José dos Campos, SP – Brazil*

<sup>b</sup> *Instituto de Biologia, Universidade Federal de Uberlândia  
Uberlândia, MG, Brazil*

---

## Abstract

Stomata are morphological structures of plants that have been receiving constant attention. These pores are responsible for the interaction between the internal plant system and the environment, working on different processes such as photosynthesis process and transpiration stream. As evaluated before, understanding the pore mechanism play a key role to explore the evolution and behavior of plants. Although the study of stomata in dicots species of plants have advanced, there is little information about stomata of cereal grasses. In addition, automated detection of these structures have been presented on the literature, but some gaps are still uncovered. This fact is motivated by high morphological variation of stomata and the presence of noise from the image acquisition step. Herein, we propose a new methodology of an automatic stomata classification and detection system in microscope images for maize cultivars. In our experiments, we have achieved an approximated accuracy of 97.1% in the identification of stomata regions using classifiers based on deep learning features.

*Keywords:* deep learning, image classification, pattern recognition.

---

## 1. Introduction

According to Willmer and Fricker [1], from all points of view, the stomata have received more constant attention probably than any other single vegetative structure in the plant. Regulating gas exchange between the plant and the environment[2], these structures are small pores on the surfaces of leaves, stems and parts of angiosperm flowers and fruits [3, 4], formed by a pair of specialized epidermal cells (guarder cells), which are found in the surface of aerial parts of most higher plants [1]. Due to the controlling of the exchange of water vapour and CO<sup>2</sup> between the interior of the leaf and the atmosphere [3]; the photosynthesis, the transpiration stream, the nutrition and the metabolism of land plants are in different ways related to the opening and closing movements of the stomata [4, 1]. Furthermore, Hetherington and Woodward point that the acquisition of stomata and an impervious leaf cuticle are considered to be key elements in the evolution of advanced terrestrial plants, allowing the plant to inhabit a range of different, often fluctuating environments but still control water content [3].

The stomatal movements distinguish this structure from other pores found in plant organs, as for example, pneumathodes, hydathodes, lenticels, and the breathing pores found in the thalli

---

\*Corresponding author: Tel.: +55 (12) 3309-9500; fax: +55 (12) 3921-8857;  
*Email address:* [ffaria@ic.unicamp.br](mailto:ffaria@ic.unicamp.br) (Fabio A. Faria)

of liverworts [1]. The control of stomatal aperture requires the coordinated control of multiple cellular processes [3] and its morphogenesis is affected by several environmental stimuli, such as relative humidity, temperature, concentration of atmospheric carbon dioxide, light intensity, and endogenous plant hormones [2, 3, 1]. Global warming for example could increase leaf transpiration and soil evaporation, and as consequence leaf stomata movements can control plant water loss and carbon gain under this water stress condition [5]. Stomatal aperture might also represent an initial response to both plants and human pathogenic bacteria [2]. In plants, it has been reported that microscopic surface openings serve as passive ports of bacterial entry during infection and the stomatal closure is part of a plant innate immune response to restrict bacterial invasion [6].

The number of pores per unit area varies not only between species but also within species because of the influence of environmental factors during growth, leaf morphology and genetic composition [4, 1]. In general, it happens due to the influence on cell size [4], e.g. smaller guarder cells are usually associated with higher stomatal frequencies [1]. Besides stomata differentiation is a process that occurs together with the development of plant organs and, therefore, counts of stomata per unit area carried out at different stages in leaf development will differ [4]. Another characteristic with great variation is the spacing of stomata, which may be fairly evenly spaced throughout a leaf, located in regular rows along the length of a leaf, or they may be clustered in patches [1].

In view of the considerations above, the types of stomatal configuration are highly different. The study and identification of these pores are key points to understand several mechanisms of plants. Haworth et al. [7] also state that it may be reasonable to assume that stomatal structures have played a significant role in plant evolution over the last 400 million years. Nevertheless, the examination of stomata from microscope images involves manual measurement and is highly dependent on biologists with expert knowledge to correctly identify and measure stomatal morphology [8].

Even with the clear relevance of these structures, a recent study [9] indicated that surprisingly we still know little about stomata of cereal grasses. These grasses are extremely important, because they provide the majority of calories consumed by humans either directly through the consumption of grains or indirectly through animals fed a diet of grains and forage[10].

As pointed by [9], the stomatal complexes in grasses differ of the dicots in many ways, e.g. the guard cells of dicots are kidney-shaped and form stomata that are scattered throughout the epidermis in a less orderly pattern, while stomatal configuration of grasses develop in parallel rows within defined and specific epidermal cell files [9]. Herein we selected microscope images of maize, which represent the most produced and consumed cultivars in the world.

In this scenario, in order to assist the biological community to perform stomata studies, we develop an automated strategy for stomata detection in microscope images. The introduction of such techniques in these analyses represent a less time consuming way of examining stomatal behavior, enabling biologists to use more data-points from the images and study a broader range of stomata.

## 2. Related Work

This section presents some works concerned on stomata identification using image processing techniques.

The research of stomata image processing started in the 80s. Recognized as possible pioneers, Omasa and Onoe [11] proposed a technique for measuring stomata characteristics in gray scale images using Fourier Transform and threshold filters for image processing and segmenting [8].

63 More recently, Sanyal et al. [12] compared tomato cultivars using several morphological char-  
64 acteristics, including stomata measures. Microscope images of different cultivars were obtained  
65 using a scanning electron microscope and the segmentation was performed using a watershed  
66 algorithm resulting in one stomata per image, followed by morphological operations (e.g., ero-  
67 sion and dilation) and Sobel kernel filters to remove noise and obtain stomatal boundaries.  
68 Using 100 images of tomato cultivars and a multilayer perceptron algorithm, it was achieved  
69 96.6% of accuracy.

70 In [13], a remote sensing processing was used to estimate stomata density. Three differ-  
71 ent regions of *Populus Euphratica* leaves were used as source of stomata images. For image  
72 processing, a object-oriented classification method was used with parameters such as scale, com-  
73 pactness and shape. This approach presented high accuracy when compared to human-based  
74 count, showing advantages over the traditional method to extract the stoma information [13].

75 Aiming the constant growth and development of stomata image processing studies, [14]  
76 published the Live Images of Plant Stomata LIPS database. In other work, [15] presented  
77 a semi-automatic stomata region detection using ImageJ software[16] and a Clustering-Aided  
78 Rapid Training Agent-based algorithm[17].

79 In an approach based solely on morphological operations[18], the authors developed a  
80 pipeline to count stomata. Initially, Gaussian low-pass filter was employed to preprocess the  
81 image and remove noise. In this sequence, reconstruction operations (e.g., opening and closing)  
82 were applied in order to highlight stomata regions. These pores were counted based on back-  
83 ground intensity differences. As result, they presented a simplest approach to count stomata  
84 with mean precision of 94.3%.

85 In 2014, [19] presented a supervised method for stomata detection based on the measure  
86 of morphological and structural features. For this task, 24 microscope images were obtained  
87 and filtered by normalization together with a Gaussian filter. The stoma images were manually  
88 segmented and the width and height parameters extracted. The stomata detection procedure  
89 based on stomata morphological constraints achieved results close to a manual counting ap-  
90 proach. With a similar procedure, a patent of stomata measurement using Gaussian filtering  
91 and morphological operations was registered [20].

92 Recently, Duarte et. al.[21] proposed a method to automatically count stomata in micro-  
93 scope images. Initially, the images were converted from RGB to CieLAB in order to select the  
94 best channel for analysis. The stomata detection was performed by Wavelet Spot Detection and  
95 morphological operations, and the watershed algorithm was used resulting in 90.6% of accuracy  
96 compared to non-automatic counting.

97 In the same year, [8] proposed an automated stomata detection and pore measurement for  
98 grapevines. This approach used a Cascade Object Detection (COD) algorithm with two main  
99 steps. First, the COD classifiers were trained using stoma and non-stoma images. Second, a  
100 slide window over the microscope images was used to identify stomata inside it. After its detec-  
101 tion, the pore measurement step was performed using binary segmentation and skeletonization  
102 with ellipse fitting, estimating pore measurements for incomplete stoma. As a result the method  
103 proposed reached 91.6% of precision.

### 104 3. Proposed System

105 This section introduces the proposed stomata classification and detection system.

#### 106 3.1. Overview

107 The proposed stomata classification and detection system is composed of two different pro-  
108 cess: (1) Stomata region classification; and (2) Stomata region detection.

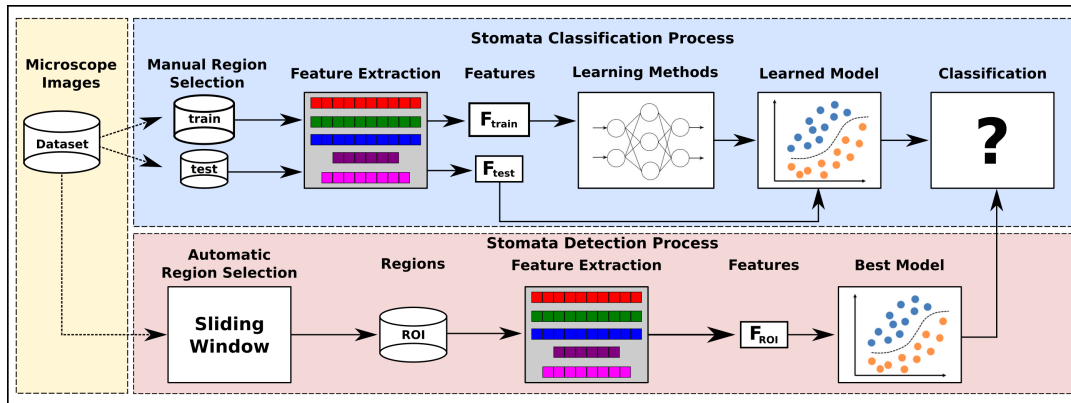

Figure 1: An overview of the stomata classification and detection system.

109 In the stomata classification process, the first step is to manually collect and label a subset  
 110 of stomata and non-stomata regions from the microscope images dataset, creating two disjoint  
 111 sets of subimages ( $train$  and  $test$ ). These sets of subimages are subjected to an image descriptor  
 112 that codes the visual properties of these subimages into feature vectors ( $F_{train}$  and  $F_{test}$ ). Next,  
 113 the feature vectors  $F_{train}$  are used as input for a learning method, creating a learned model for  
 114 stomata classification task. Finally, each feature vector  $F_{test}$  is classified by this learned model.  
 115 In the classification process, different image descriptors and learning methods are evaluated  
 116 through a  $k$ -fold crossvalidation protocol and the best model is adopted to detect stomata  
 117 regions on next process of proposed system.

118 In the stomata detection process, a sliding window is used on each microscope image from  
 119 entire dataset, creating a set of regions of interest ( $ROI$ ), which are subjected to an image  
 120 descriptor resulting in the feature vectors ( $F_{ROI}$ ) and finally,  $F_{ROI}$  are classified by the best  
 121 model, i.e., a tuple (learning method + image descriptor) found in the classification process.

### 122 3.2. Stomata Classification Process

123 The first step for identifying stomata structures is the manual selection of a set of subimages  
 124 containing stomata or other plant structures, labeled as non-stomata. Due to the differences  
 125 between stomata size in distinct microscope images, we adopted a region/window of dimension  
 126  $151 \times 258$  pixels, which was enough to include all of stomata regions in the available microscope  
 127 images from dataset. Thus, a total of 1000 subimages of each class (stomata and non-stomata)  
 128 have been selected to compose the new dataset.

129 Once the dataset has been created, the next step is to extract visual properties from the  
 130 subimages using image descriptors. In this work, we evaluated eleven different image descrip-  
 131 tors, DAISY, HOG, GIST, Haralick, LBP, and six deep learning-based descriptor (DenseNet121,  
 132 InceptionResNetV2, InceptionV3, ModbileNet, NasNet and VGG16).

#### 133 3.2.1. DAISY

134 DAISY descriptor relies on gradient orientation histograms. For an input image, orientation  
 135 maps are calculated based on quantized directions. Each location  $(u, v)$  in a given map with  
 136 a specific direction is equal to the image gradient norm (if its value is bigger than zero, else  
 137 it is equal to zero).  $H$  orientation maps and several processes of convolution (using Gaussian  
 138 kernels) are used to obtain convolved orientation maps. DAISY descriptor is the vector of values  
 139 from these convolved maps located on concentric circles centered on a location, and where the  
 140 amount of Gaussian smoothing is proportional to the radius of the circles [22].

### 141 3.2.2. Histogram of Oriented Gradients (HOG)

142 Feature descriptor based on the creation of histograms with gradient orientation using its  
143 magnitude in localized portions of an image [23]. Local shape information is well described by  
144 the distribution of gradients in different orientations [24].

### 145 3.2.3. GIST

146 This descriptor has its focus on the shape of the scene itself, on the relationship between the  
147 outlines of the surfaces and their properties, ignoring the local objects in the scene and their  
148 relationships [25]. This approach does not require any form of segmentation and is based on a  
149 set of perceptual dimensions (naturalness, openness, roughness, expansion, ruggedness) [24].

### 150 3.2.4. Haralick Texture Features

151 As a first step, a gray-level co-occurrence matrix (GLCM) is constructed by considering the  
152 relation of each voxel with its neighborhood. Using different statistical measures (e.g., entropy,  
153 energy, variance, and correlation), texture properties are coded from the image into feature  
154 vectors [26].

### 155 3.2.5. Local Binary Patterns (LBP)

156 Computing a local representation of texture based on the comparison of each pixel with its  
157 neighborhood, a comparison threshold is defined and an output image is built with the binary  
158 to decimal values conversion and an histogram can be created [27].

### 159 3.2.6. Deep Convolutional Neural Network (DCNN)

160 A typical convolutional network is a fully-connected network where each hidden activation  
161 is computed by multiplying the entire input  $V$  by weights  $W$  in a given layer [28]. In this  
162 technique, a connection between traditional optimization-based schemes and a neural network  
163 architecture is used, where a separable structure is introduced as a reliable support for robust  
164 deconvolution against artifacts [29]. Once we do not have available a large scale of image to  
165 train a deep learning architecture from scratch, a good alternative is to use the transfer learn-  
166 ing approach [30]. This approach uses deep learning architectures pre-trained with ImageNet  
167 dataset [31], adding other layers according to target application and then, the last layer can be  
168 used as a feature extraction function (image descriptor). In this work, we adopted six different  
169 architectures, DenseNet121 [32], InceptionResNetV2 [33], InceptionV3 [34], MobileNet [35],  
170 NasNet [36] and VGG16 [37].

171 In this work, we used three different machine learning methods, Support Vector Machine [38]  
172 (SVM), Multilayer Perceptron [39] (MLP) and Adaboost [40] to evaluate the overall effec-  
173 tiveness results and to find the best learned model, i.e., a tuple (learning method + image  
174 descriptor) that will be adopted to label the new stomata regions on the next process.

175 Figure 2 shows the steps of the stomata classification process proposed in this work.

## 176 3.3. Stomata Detection Process

177 The methodology for detecting stomata regions is divided into the following steps as can be  
178 seen in image 4:

### 179 3.3.1. Dataset

180 A dataset with stoma and non-stoma subimages (see Figure 3) is created through a manual  
181 selection task from microscope images.

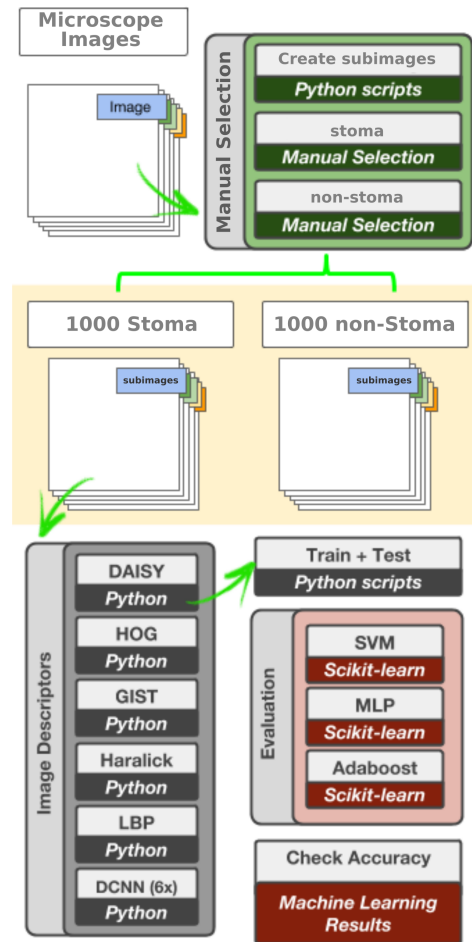

Figure 2: In-depth explanation of the stomata classification process.

### 182 3.3.2. Feature extraction

183 As the best descriptor has been found on the stomata classification process, the features  
184 of the created dataset are generated and stored into a table with the labels of each category  
185 (stoma or non-stoma).

### 186 3.3.3. Creation of the learned model

187 The descriptors were evaluated using three different learning methods, support vector ma-  
188 chine (SVM), multi layer perceptron (MLP), and Adaboost. Based on the best effectiveness  
189 results achieved by learned model (a tuple composed of descriptor + learning method), the  
190 most appropriate learned model is selected to label the subimage in next step.

### 191 3.3.4. Sliding window iteration

192 Using a window of  $151 \times 258$  pixels, an iteration over the microscope images is performed and  
193 for each generated subimage a label (stoma or non-stoma) is obtained using the best learned  
194 model. Due to the possible separation of stoma structures, the windows were created with a  
195 stride of 100 pixels in columns and rows.

### 196 3.3.5. Selection of positive regions

197 Based on the previous classification, an auxiliary matrix is filled in order to enable the  
198 posterior identification of stoma regions. Pixels with positive occurrence of stoma are separated  
199 from the rest of the image and the stoma regions can be analyzed.

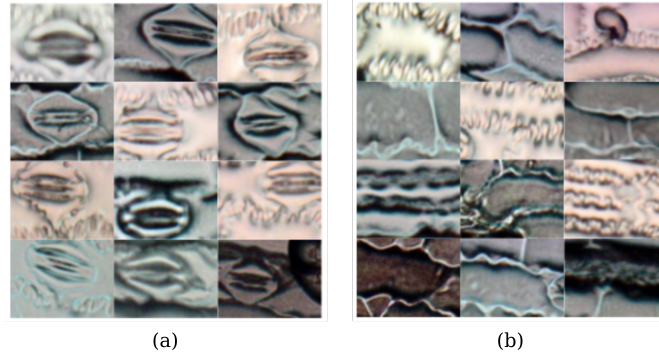

Figure 3: Examples of stoma (a) and non-stoma (b) subimages/regions, which were manually selected and labeled in this work.

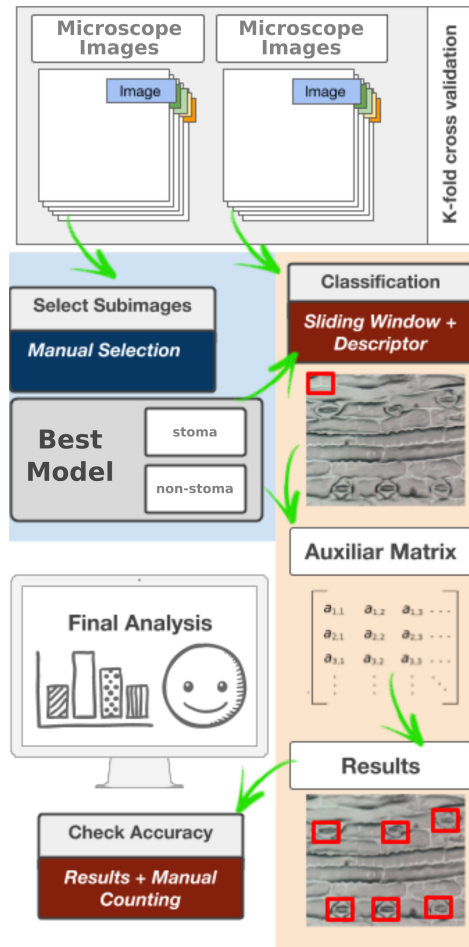

Figure 4: In-depth explanation of the stomata identification process.

## 200 4. Experimental Setup

201 This section describes, in details, the dataset creation process, the technologies, and evalu-  
 202 ation protocol used in this work.

### 203 4.1. Image Dataset

204 For optical microscope investigation, it has been necessary to separate the epidermis from  
 205 the rest of the leaf itself in order to get a clear view of the cell walls and the shape of the  
 206 stomata [41]. Herein cyanoacrylate glue was applied to the microscope slide in order to obtain

207 an impression of the sheet surface to be captured using a camera attached to a microscope.  
208 Leaves were sampled from 20 *Zea mays* cultivars (maize) granted by Nidera Sementes company  
209 (Uberlândia-MG) producing a total of 200 microscope images with different dimensions such as  
210  $2565 \times 3583$ ,  $2675 \times 3737$ , and  $2748 \times 3840$ .

211 The selected plant species were treated with colchicine [42] in order to change their ploidy  
212 and cell morphology for further studies. Due to the plant ploidy specificity, different images  
213 might have different stomata sizes and width. Besides, as previously mentioned, stomata dif-  
214 ferentiation is a process that occurs together with the development of plant organs and herein  
215 plants with different ages were used and a clear distinction of the images and plant morpholo-  
216 gies can be visualized in Figure 5. In these microscope images, different types of noise might  
217 be observed due to many factors which can be seen in Figure 6.

218 In the experiments, the dataset with 200 microscope images was submitted to the 5-fold  
219 crossvalidation protocol, i.e., four parts of the dataset compose the training set (160 images)  
220 and one part belongs to the test set (40 images). This process is repeated five times. There-  
221 fore, in the stomata classification task, for each microscope image, 5 stoma and 5 non-stoma  
222 regions/subimages has been manually select to compose training and test sets in an overall of  
223 2000 subimages.

224 In the stomata detection task, respecting the separation of the disjoint sets of the 5-fold  
225 crossvalidation protocol, each training set created in the stomata classification task is main-  
226 tained with 1600 subimages. However, the test sets are generated by a sliding window iteration.  
227 Hence, for each one of the 40 microscope images existing in each test set, between 876 and 963  
228 regions/subimages are selected by a sliding window iteration resulting in approximately 44,000  
229 subimages per test set in a overall of 217,866 subimages for the five runs.

#### 230 *4.2. Programming Environment and Libraries*

231 All the approaches presented in this paper were run on a personal computer with 2.7GHz  
232 Intel Core i7-7500U 2.7GHz Intel Core i7-7500U with 16GB of RAM and NVIDIA GeForce  
233 940MX 4GB graphic card. In the same way, the programming language was Python2 with  
234 the following libraries: scikit-learn [43], pyleargist, scikit-image[44], opencv [45], keras[46] and  
235 tensorflow[47]. A greater part of the libraries were used in order to call image descriptors and  
236 deep learning methods.

#### 237 *4.3. Evaluation Protocol*

238 In order to check the accuracy of the created system for classifying and identifying stomata  
239 regions, it was used a  $k$ -fold cross validation with  $k = 5$ . The classified images represent the  
240 test set and the subimages used to create the learned model were extracted from the training  
241 set. A manual count was performed for each image and we evaluated the results using the  
242 quantity of identified stomata in selected regions and the total of positive (True Positive) and  
243 false classifications (False Positive) using all the generated windows, including the overlapped  
244 region results.

## 245 **5. Results and Discussion**

246 This section shows all experiments performed to validate the proposed system.

### 247 *5.1. Stomata Classification Task*

248 In this first experiment, we performed a comparative analysis among five image descriptors  
249 (HOG, GIST, DAISY, LBP, and Haralick) and three learning methods (Adaboost, MLP, and



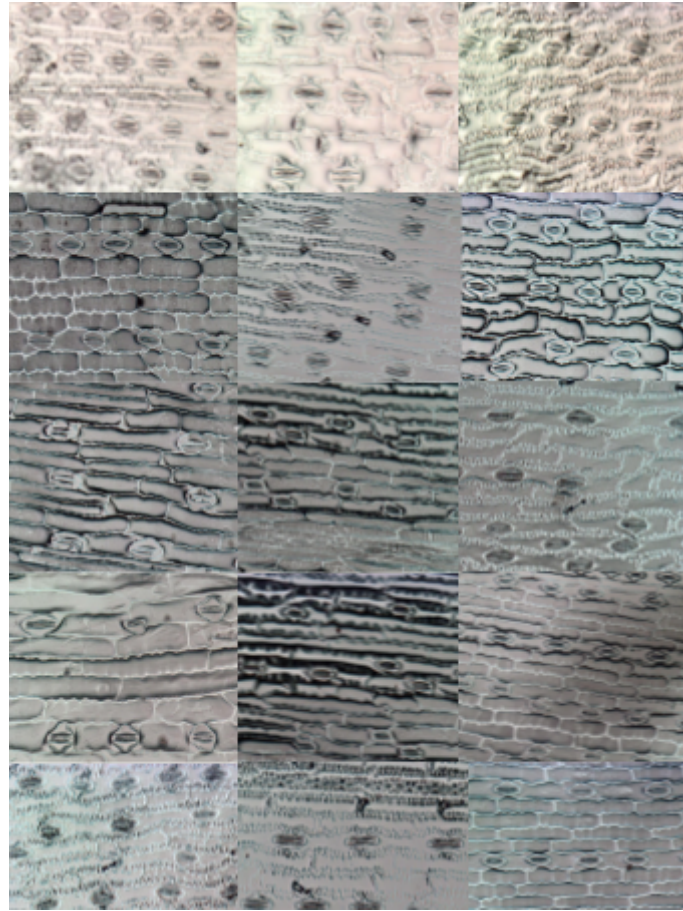

Figure 5: Fifteen different microscope images of Maize Cultivars used in this work.

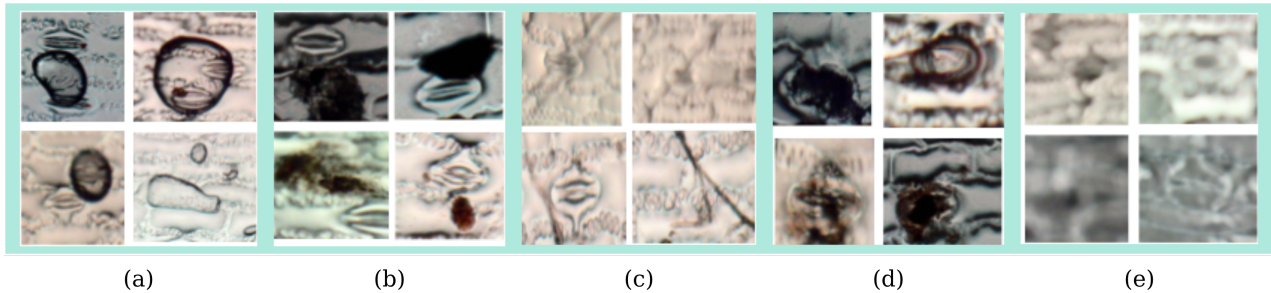

Figure 6: Different types of noise present in the microscopic images. (a) the usage of cyanoacrylate glue can generate air bubbles; (b) leaves residuals might be captured by the microscope; (c) the leaves might bend and generate grooves in the image; (d) degraded stomata due to biological factors; and (e) low image quality due to equipment limitations.

250 SVM) for stomata classification task. All of effectiveness results are measured in mean accuracy  
251 of the 5-fold crossvalidation protocol.

252 As we can observe, in Table 1, the best results have achieved by descriptors purely based on  
253 gradient (HOG and DAISY). HOG descriptor with MLP (HOG+MLP) and DAISY descriptor  
254 with Adaboost (DAISY+Adaboost) achieved 96.0% of mean accuracy. In a general comparison  
255 among all image descriptors, HOG descriptor achieved the best effectiveness results with mean  
256 accuracy of 94.7% and this can be justified due to the specific shape of the stoma when compared  
257 to other parts of the images. Therefore, this fact can show us that shape is the visual property  
258 more indicate for the target application. Although GIST is a shape descriptor, perhaps its way

259 of dealing with visual properties globally (holistic) may explain its poor performance in such  
260 images.

Table 1: Mean Accuracy of the classifiers based on image descriptor features for stomata classification task.

| Learning Method | HOG         | GIST | DAISY       | LBP  | Haralick |
|-----------------|-------------|------|-------------|------|----------|
| Adaboost        | 93.0        | 79.0 | <b>96.0</b> | 88.0 | 87.0     |
| MLP             | <b>96.0</b> | 81.0 | 92.0        | 85.0 | 80.0     |
| Linear SVM      | <b>95.0</b> | 81.0 | 80.0        | 89.0 | 86.0     |
| <b>Mean</b>     | <b>94.7</b> | 80.3 | 89.3        | 87.3 | 84.3     |

261 As the ideal scenario is that all regions are correctly classified in the stomata detection  
262 task, another more powerful description approach called deep learning have been performed to  
263 improve the effectiveness results achieved by image descriptors.

264 Table 2 shows effectiveness results of six different deep learning architectures (DenseNet121  
265 – DenseNet, InceptionResNetV2 – IResNet, InceptionV3 – Inception, MobileNet, NasNet, and  
266 VGG16) using three learning methods (Adaboost, MLP, and SVM).

Table 2: Mean Accuracy of the classifiers based on deep learning features for stomata classification task.

| Classifier    | DenseNet | IResNet | Inception | MobileNet | NasNet | VGG16        |
|---------------|----------|---------|-----------|-----------|--------|--------------|
| AdaBoost      | 95.0     | 96.0    | 90.0      | 96.0      | 91.0   | <b>99.0</b>  |
| MLP           | 98.0     | 94.0    | 88.0      | 98.0      | 95.0   | <b>100.0</b> |
| Linear SVM    | 80.0     | 94.0    | 91.0      | 98.0      | 95.0   | <b>100.0</b> |
| <b>Epochs</b> | 10       | 13      | 6         | 7         | 16     | 6            |
| <b>Mean</b>   | 91.0     | 94.7    | 89.7      | 97.3      | 93.7   | <b>99.7</b>  |

267 As we can observe, the classifiers based on deep learning features outperformed ones based on  
268 image descriptors except for HOG descriptor. In this experiment, the classifiers using VGG16  
269 features achieved the best results with 100% of mean accuracy in almost all three learning  
270 techniques performed in this work for stomata classification task.

## 271 5.2. Stomata Detection Task

272 In this experiment, the classifier based on VGG16 features with the support vector machine  
273 technique has been adopted for stomata detection task.

274 Using the sliding window approach for producing possible stoma regions, we have generated  
275 between 876 and 963 regions/subimages for each microscope image (overall of 217,866 subim-  
276 ages) and a 5-fold crossvalidation protocol has been adopted. Each one of these subimages has  
277 been labeled using the classifier using support vector machine technique and features generated  
278 by VGG16 architecture (SVM+VGG16).

279 Table 3 summarizes the effectiveness results of the classifier SVM+VGG16. The amount of  
280 detected stoma regions are compatible with the manual counting, which shows a good perfor-  
281 mance of the proposed system. All the 5-fold presented similar effectiveness results with 97.1%  
282 of detected stoma regions, i.e., 11388 stomata of the 11734 stomata existing in the dataset.

283 It is important to comment that the achieved results are better than ones described by [8],  
284 which has had an overall of 91.6% of detected regions in the their application.

285 Once the stomata region candidates have been detected in a microscope image (see Figure 7-  
286 (a)), an auxiliary matrix is created through stomata region occurrence (see Figure 7-(b)), a

Table 3: Effectiveness results of the classifier (SVM+VGG16) for sliding window classification.

| Fold           | # Stoma Manual Counting | # Detected Stoma Regions | Total of Regions | # True Positives | # False Positives |
|----------------|-------------------------|--------------------------|------------------|------------------|-------------------|
| 1              | 2244                    | 2189 (97.5%)             | 43524            | 5094             | 107 (0.02%)       |
| 2              | 2374                    | 2300 (96.9%)             | 43458            | 5307             | 159 (0.03%)       |
| 3              | 2428                    | 2316 (95.4%)             | 43524            | 5506             | 153 (0.03%)       |
| 4              | 2279                    | 2213 (97.1%)             | 43680            | 5596             | 60 (0.01%)        |
| 5              | 2409                    | 2370 (98.4%)             | 43680            | 5463             | 49 (0.01%)        |
| <b>Mean</b>    | —                       | 2277.6 (97.1%)           | —                | 5393.2           | 105.6 (0.02%)     |
| <b>Overall</b> | 11734                   | 11388                    | 217866           | —                | —                 |

287 merge between microscope image and auxiliary matrix is performed (see Figure 7-(c)), and  
 288 finally, all of stomata are identified in the microscope image (see Figure 7-(d)).

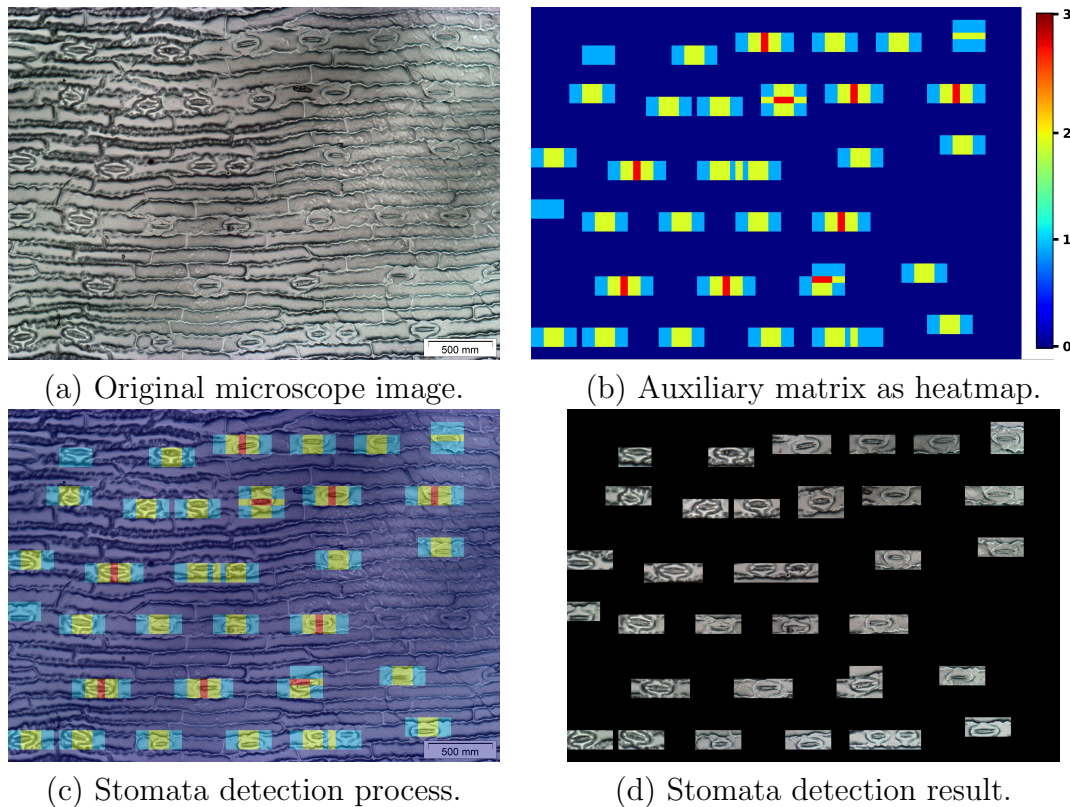

Figure 7: Pos-processing of a microscope image.

289 As it has been observed in the Table 3, the stomata detection task is not perfect, thus  
 290 we have analyzed the quality of the effectiveness results. Figure 8 shows the hit and miss  
 291 classification results achieved by our proposed system.

292 It is important to observe that regions/subimages with low quality have been also correctly  
 293 classified as containing a stoma as shown in Figure 8-(a). This fact corroborates the usage  
 294 of the VGG16 features for stomata detection task. Miss classification can be visualized in  
 295 Figure 8-(b). Most of these regions/subimages represent plant structures similar to stomata.

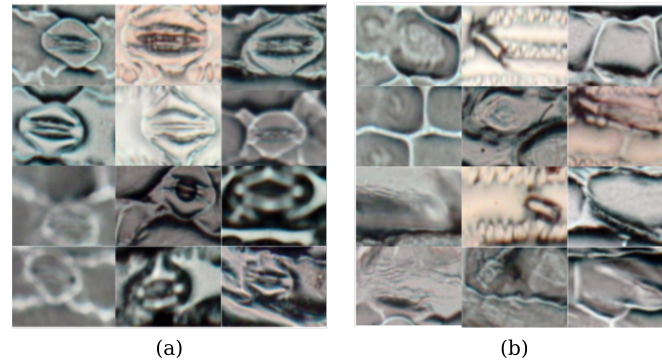

Figure 8: Examples of the stomata classification results. (a) True positive subimages; and (b) False positive subimages.

## 296 6. Conclusion

297 Leaves microscope images contain relevant information about plant morphology and might  
298 be used for studying specific characteristics of metabolic pathways and different biological  
299 processes. A vegetative structure that has received more attention is called stoma (in the  
300 plural, stomata), which are small pores on the surfaces of aerial parts of most higher plants  
301 (e.g., leaves, stems and parts of angiosperm flowers and fruits). Stomata are responsible by  
302 many functionality such as (1) exchange of water vapour and  $\text{CO}_2$  between the interior of the  
303 leaf and the atmosphere; (2) photosynthesis; (3) transpiration stream; (4) nutrition; and (5)  
304 metabolism of land plants. Therefore, the understanding of the stomata is of great importance  
305 in the exploration of the evolution and behavior of plants.

306 In this work, we proposed a stomata classification and identification system in microscope  
307 images of maize cultivars. Herein we have evaluated different extraction techniques (image  
308 descriptor and deep learning) and learning methods (Adaboost, MLP, and SVM) for the task  
309 of correctly classifying stomata regions. In this experiments, our approach has achieved mean  
310 accuracy of 96% using HOG+MLP and mean accuracy of 100% with VGG16 features using  
311 support vector machine (VGG16+SVM).

312 In the stomata detection task with a sliding window approach for generating all possible  
313 regions/subimages from the microscope images, our system has detected 97.1% of the stomata  
314 regions existing in the 200 microscope image of the dataset. This fact could show us that our  
315 system using deep learning features might be an appropriate solution for target application.

316 As future work, we intend to develop a computational toolkit to support the specialists on  
317 biology area in their research.

## 318 Acknowledgement

319 The authors thanks the support of the Brazilian scientific funding agency CNPq through  
320 the Universal Project (grant #408919/2016-7) and the support of NVIDIA Corporation for the  
321 donation of the GPUs used for this research.

## 322 References

- 323 [1] C. Willmer and M. Fricker, *Stomata*. Springer Science & Business Media, 1996, vol. 2.
- 324 [2] M. Melotto, W. Underwood, and S. Y. He, "Role of stomata in plant innate immunity and foliar bacterial  
325 diseases," *Annu. Rev. Phytopathol.*, vol. 46, pp. 101–122, 2008.

- 326 [3] A. M. Hetherington and F. I. Woodward, “The role of stomata in sensing and driving environmental  
327 change,” *Nature*, vol. 424, no. 6951, p. 901, 2003.
- 328 [4] H. Meidner and T. A. Mansfield, *Physiology of stomata*. Tata Mcgraw-Hill Publishing Company Limited;  
329 Bombay, 1968.
- 330 [5] G. Wu, H. Liu, L. Hua, Q. Luo, Y. Lin, P. He, S. Feng, J. Liu, and Q. Ye, “Differential responses of stomata  
331 and photosynthesis to elevated temperature in two co-occurring subtropical forest tree species,” *Frontiers  
332 in plant science*, vol. 9, p. 467, 2018.
- 333 [6] M. Melotto, W. Underwood, J. Koczan, K. Nomura, and S. Y. He, “Plant stomata function in innate  
334 immunity against bacterial invasion,” *Cell*, vol. 126, no. 5, pp. 969–980, 2006.
- 335 [7] M. Haworth, C. Elliott-Kingston, and J. C. McElwain, “Stomatal control as a driver of plant evolution,”  
336 *Journal of Experimental Botany*, vol. 62, no. 8, pp. 2419–2423, 2011.
- 337 [8] H. Jayakody, S. Liu, M. Whitty, and P. Petrie, “Microscope image based fully automated stomata detection  
338 and pore measurement method for grapevines,” *Plant Methods*, vol. 13, no. 1, p. 94, 2017.
- 339 [9] C. Hepworth, R. S. Caine, E. L. Harrison, J. Sloan, and J. E. Gray, “Stomatal development: focusing on  
340 the grasses,” *Current opinion in plant biology*, vol. 41, pp. 1–7, 2018.
- 341 [10] J. Vogel, “Unique aspects of the grass cell wall,” *Current opinion in plant biology*, vol. 11, no. 3, pp.  
342 301–307, 2008.
- 343 [11] K. Omasa and M. Onoe, “Measurement of stomatal aperture by digital image processing,” *Plant and cell  
344 physiology*, vol. 25, no. 8, pp. 1379–1388, 1984.
- 345 [12] P. Sanyal, U. Bhattacharya, and S. K. Bandyopadhyay, “Analysis of sem images of stomata of different  
346 tomato cultivars based on morphological features,” in *Modeling & Simulation, 2008. AICMS 08. Second  
347 Asia International Conference on*. IEEE, 2008, pp. 890–894.
- 348 [13] S. Jian, C. Zhao, and Y. Zhao, “Based on remote sensing processing technology estimating leaves stomatal  
349 density of populus euphratica,” in *Geoscience and Remote Sensing Symposium (IGARSS), 2011 IEEE  
350 International*. IEEE, 2011, pp. 547–550.
- 351 [14] T. Higaki, N. Kutsuna, and S. Hasezawa, “Lips database with lipservice: a microscopic image database of  
352 intracellular structures in arabidopsis guard cells,” *BMC plant biology*, vol. 13, no. 1, p. 81, 2013.
- 353 [15] K. N. H. S. Higaki, Takumi, “Carta-based semi-automatic detection of stomatal regions on an arabidopsis  
354 cotyledon surface,” *PLANT MORPHOLOGY*, vol. 26, no. 1, pp. 9–12, 2014.
- 355 [16] W. S. Rasband, “Imagej, us national institutes of health, bethesda, maryland, usa,” [http://imagej.nih.  
356 gov/ij/](http://imagej.nih.gov/ij/), 2011.
- 357 [17] N. Kutsuna, T. Higaki, S. Matsunaga, T. Otsuki, M. Yamaguchi, H. Fujii, and S. Hasezawa, “Active  
358 learning framework with iterative clustering for bioimage classification,” *Nature communications*, vol. 3, p.  
359 1032, 2012.
- 360 [18] M. W. da Silva Oliveira, N. R. da Silva, D. Casanova, L. F. S. Pinheiro, R. M. Kolb, and O. M. Bruno,  
361 “Automatic counting of stomata in epidermis microscopic images,” 2014.
- 362 [19] H. Laga, F. Shahinnia, and D. Fleury, “Image-based plant stornata phenotyping,” in *Control Automation  
363 Robotics & Vision (ICARCV), 2014 13th International Conference on*. IEEE, 2014, pp. 217–222.
- 364 [20] F. Awwad, S. Abuqamar, T. Ksikisi, S. Thaker, and A. A. R. Rabee, “Process and device for direct  
365 measurements of plant stomata,” Jun. 15 2017, uS Patent App. 14/968,954.
- 366 [21] K. T. Duarte, M. A. G. de Carvalho, and P. S. Martins, “Segmenting high-quality digital images of stomata  
367 using the wavelet spot detection and the watershed transform.” in *VISIGRAPP (4: VISAPP)*, 2017, pp.  
368 540–547.

- 369 [22] E. Tola, V. Lepetit, and P. Fua, “Daisy: An efficient dense descriptor applied to wide-baseline stereo,”  
370 *IEEE transactions on pattern analysis and machine intelligence*, vol. 32, no. 5, pp. 815–830, 2010.
- 371 [23] R. K. McConnell, “Method of and apparatus for pattern recognition,” Jan. 28 1986, uS Patent 4,567,610.
- 372 [24] M. Douze, H. Jégou, H. Sandhawalia, L. Amsaleg, and C. Schmid, “Evaluation of gist descriptors for web-  
373 scale image search,” in *Proceedings of the ACM International Conference on Image and Video Retrieval*.  
374 ACM, 2009, p. 19.
- 375 [25] A. Oliva and A. Torralba, “Modeling the shape of the scene: A holistic representation of the spatial  
376 envelope,” *International journal of computer vision*, vol. 42, no. 3, pp. 145–175, 2001.
- 377 [26] R. M. Haralick, K. Shanmugam *et al.*, “Textural features for image classification,” *IEEE Transactions on*  
378 *systems, man, and cybernetics*, no. 6, pp. 610–621, 1973.
- 379 [27] T. Ojala, M. Pietikäinen, and D. Harwood, “A comparative study of texture measures with classification  
380 based on featured distributions,” *Pattern recognition*, vol. 29, no. 1, pp. 51–59, 1996.
- 381 [28] T. N. Sainath, A.-r. Mohamed, B. Kingsbury, and B. Ramabhadran, “Deep convolutional neural networks  
382 for lvcsr,” in *Acoustics, speech and signal processing (ICASSP), 2013 IEEE international conference on*.  
383 IEEE, 2013, pp. 8614–8618.
- 384 [29] L. Xu, J. S. Ren, C. Liu, and J. Jia, “Deep convolutional neural network for image deconvolution,” in  
385 *Advances in Neural Information Processing Systems*, 2014, pp. 1790–1798.
- 386 [30] S. J. Pan and Q. Yang, “A survey on transfer learning,” *IEEE Trans. on Knowl. and Data Eng.*, vol. 22,  
387 no. 10, pp. 1345–1359, Oct. 2010.
- 388 [31] O. Russakovsky, J. Deng, H. Su, J. Krause, S. Satheesh, S. Ma, Z. Huang, A. Karpathy, A. Khosla,  
389 M. Bernstein, A. C. Berg, and L. Fei-Fei, “ImageNet Large Scale Visual Recognition Challenge,” *Internation-*  
390 *ational Journal of Computer Vision (IJCV)*, vol. 115, no. 3, pp. 211–252, 2015.
- 391 [32] G. Huang, Z. Liu, and K. Q. Weinberger, “Densely connected convolutional networks,” *CoRR*, vol.  
392 abs/1608.06993, 2016.
- 393 [33] C. Szegedy, S. Ioffe, and V. Vanhoucke, “Inception-v4, inception-resnet and the impact of residual connec-  
394 tions on learning,” *CoRR*, vol. abs/1602.07261, 2016.
- 395 [34] C. Szegedy, V. Vanhoucke, S. Ioffe, J. Shlens, and Z. Wojna, “Rethinking the inception architecture for  
396 computer vision,” *CoRR*, vol. abs/1512.00567, 2015.
- 397 [35] A. G. Howard, M. Zhu, B. Chen, D. Kalenichenko, W. Wang, T. Weyand, M. Andreetto, and H. Adam,  
398 “Mobilenets: Efficient convolutional neural networks for mobile vision applications,” *arXiv preprint*  
399 *arXiv:1704.04861*, 2017.
- 400 [36] B. Zoph, V. Vasudevan, J. Shlens, and Q. V. Le, “Learning transferable architectures for scalable image  
401 recognition,” *CoRR*, vol. abs/1707.07012, 2017.
- 402 [37] K. Simonyan and A. Zisserman, “Very deep convolutional networks for large-scale image recognition,” in  
403 *International Conference on Learning Representations*, 2015.
- 404 [38] B. E. Boser, I. M. Guyon, and V. N. Vapnik, “A training algorithm for optimal margin classifiers,” in  
405 *Workshop on Computational Learning Theory*, ser. COLT ’92, 1992, pp. 144–152.
- 406 [39] K. Hornik, M. Stinchcombe, and H. White, “Multilayer feedforward networks are universal approximators,”  
407 *Neural Netw.*, vol. 2, no. 5, pp. 359–366, Jul. 1989.
- 408 [40] R. E. Schapire, “A brief introduction to boosting,” in *Proceedings of the 16th International Joint Conference*  
409 *on Artificial Intelligence - Volume 2*, ser. IJCAI’99, San Francisco, CA, USA, 1999, pp. 1401–1406.

- 410 [41] J. J. Castilloa and M. Ferrarotto, “Evaluation of cyanoacrylate glues for making attached living-leaves  
411 epidermis replicas and its scanning electron microscopy observations (evaluación de pegamentos de  
412 cianoacrilato para hacer réplicas epidérmicas en hojas vivas adheridas y su observación al meb),” *Scanning*,  
413 vol. 20, no. 8, pp. 557–563, 1998.
- 414 [42] J. Doležel and P. Binarová, “The effects of colchicine on ploidy level, morphology and embryogenic capacity  
415 of alfalfa suspension cultures,” *Plant Science*, vol. 64, no. 2, pp. 213–219, 1989.
- 416 [43] F. Pedregosa, G. Varoquaux, A. Gramfort, V. Michel, B. Thirion, O. Grisel, M. Blondel, P. Prettenhofer,  
417 R. Weiss, V. Dubourg, J. Vanderplas, A. Passos, D. Cournapeau, M. Brucher, M. Perrot, and E. Duchesnay,  
418 “Scikit-learn: Machine learning in Python,” *Journal of Machine Learning Research*, vol. 12, pp. 2825–2830,  
419 2011.
- 420 [44] S. van der Walt, J. L. Schönberger, J. Nunez-Iglesias, F. Boulogne, J. D. Warner, N. Yager, E. Guillard,  
421 T. Yu, and the scikit-image contributors, “scikit-image: image processing in Python,” *PeerJ*, vol. 2, p.  
422 e453, 6 2014.
- 423 [45] G. Bradski, “The OpenCV Library,” *Dr. Dobb’s Journal of Software Tools*, 2000.
- 424 [46] F. Chollet *et al.*, “Keras,” <https://keras.io>, 2015.
- 425 [47] M. A. et. al., “TensorFlow: Large-scale machine learning on heterogeneous systems,” 2015, software avail-  
426 able from [tensorflow.org](https://www.tensorflow.org). [Online]. Available: <https://www.tensorflow.org/>
